# Supplementary material for: Polyketides and Meroterpenes from the Marine-Derived Fungi Aspergillus unguis 158SC-067 and A. flocculosus 01NT-1.1.5 and Their Cytotoxic and Antioxidant Activities
Source: MDPI journal article supplement (doi:10.3390/md19080415), 2021-07-26
Supplement: s1 [file s1]

# Polyketides and Meroterpenes from the Marine-Derived Fungi *Aspergillus unguis* 158SC-067 and *A. flocculosus* 01NT-1.1.5 and their Cytotoxic and Antioxidant Activities

Cao Van Anh <sup>1,2</sup>, Jong Soon Kang <sup>3</sup>, Byeoung-Kyu Choi <sup>1</sup>, Hwa-Sun Lee <sup>1</sup>, Chang-Su Heo <sup>1,2</sup> and Hee Jae Shin <sup>1,2,\*</sup>

<sup>1</sup> Marine Natural Products Chemistry Laboratory, Korea Institute of Ocean Science and Technology, 385 Haeyang-ro, Yeongdo-gu, Busan 49111, Korea; caovananh@kiost.ac.kr (C.V.A.); choibk4404@kiost.ac.kr (B.-K.C.); hwasunlee@kiost.ac.kr (H.-S.L.); science30@kiost.ac.kr (C.-S.H.)

<sup>2</sup> Department of Marine Biotechnology, University of Science and Technology (UST), 217 Gajungro, Yuseong-gu, Daejeon 34113, Korea

<sup>3</sup> Laboratory Animal Resource Center, Korea Research Institute of Bioscience and Biotechnology, 30 Yeongudanjiro, Cheongju 28116, Korea; kanjon@kribb.re.kr

\* Correspondence: shinhj@kiost.ac.kr; Tel.: +82-51-664-3341; Fax: +82-51-664-3340

## Contents

|                                                                                                   |    |
|---------------------------------------------------------------------------------------------------|----|
| <b>Figure S1.</b> HR-ESIMS data of <b>1</b> . .....                                               | 3  |
| <b>Figure S2.</b> $^1\text{H}$ NMR data of <b>1</b> (600 MHz, $\text{CD}_3\text{OD}$ ). .....     | 4  |
| <b>Figure S3.</b> $^{13}\text{C}$ NMR data of <b>1</b> (150 MHz, $\text{CD}_3\text{OD}$ ). .....  | 4  |
| <b>Figure S4.</b> HSQC spectrum of <b>1</b> ( $\text{CD}_3\text{OD}$ ). .....                     | 5  |
| <b>Figure S5.</b> COSY spectrum of <b>1</b> ( $\text{CD}_3\text{OD}$ ). .....                     | 6  |
| <b>Figure S6.</b> HMBC spectrum of <b>1</b> ( $\text{CD}_3\text{OD}$ ). .....                     | 7  |
| <b>Figure S7.</b> NOESY spectrum of <b>1</b> ( $\text{CD}_3\text{OD}$ ). .....                    | 8  |
| <b>Figure S8.</b> HR-ESIMS data of <b>7</b> . .....                                               | 9  |
| <b>Figure S9.</b> $^1\text{H}$ NMR data of <b>7</b> (600 MHz, $\text{CD}_3\text{OD}$ ). .....     | 10 |
| <b>Figure S10.</b> $^{13}\text{C}$ NMR data of <b>7</b> (150 MHz, $\text{CD}_3\text{OD}$ ). ..... | 10 |
| <b>Figure S11.</b> HSQC spectrum of <b>7</b> ( $\text{CD}_3\text{OD}$ ). .....                    | 11 |
| <b>Figure S12.</b> COSY spectrum of <b>7</b> ( $\text{CD}_3\text{OD}$ ). .....                    | 12 |
| <b>Figure S13.</b> HMBC spectrum of <b>7</b> ( $\text{CD}_3\text{OD}$ ). .....                    | 13 |
| <b>Figure S14.</b> NOESY spectrum of <b>7</b> ( $\text{CD}_3\text{OD}$ ). .....                   | 14 |
| <b>Figure S15.</b> LCESI-MS data of <b>9</b> . .....                                              | 15 |
| <b>Figure S16.</b> $^1\text{H}$ NMR data of <b>9</b> (600 MHz, $\text{CD}_3\text{OD}$ ). .....    | 16 |
| <b>Figure S17.</b> $^1\text{H}$ NMR data of <b>9</b> (600 MHz, $\text{CDCl}_3$ ). .....           | 16 |
| <b>Figure S18.</b> $^{13}\text{C}$ NMR data of <b>9</b> (150 MHz, $\text{CD}_3\text{OD}$ ). ..... | 17 |

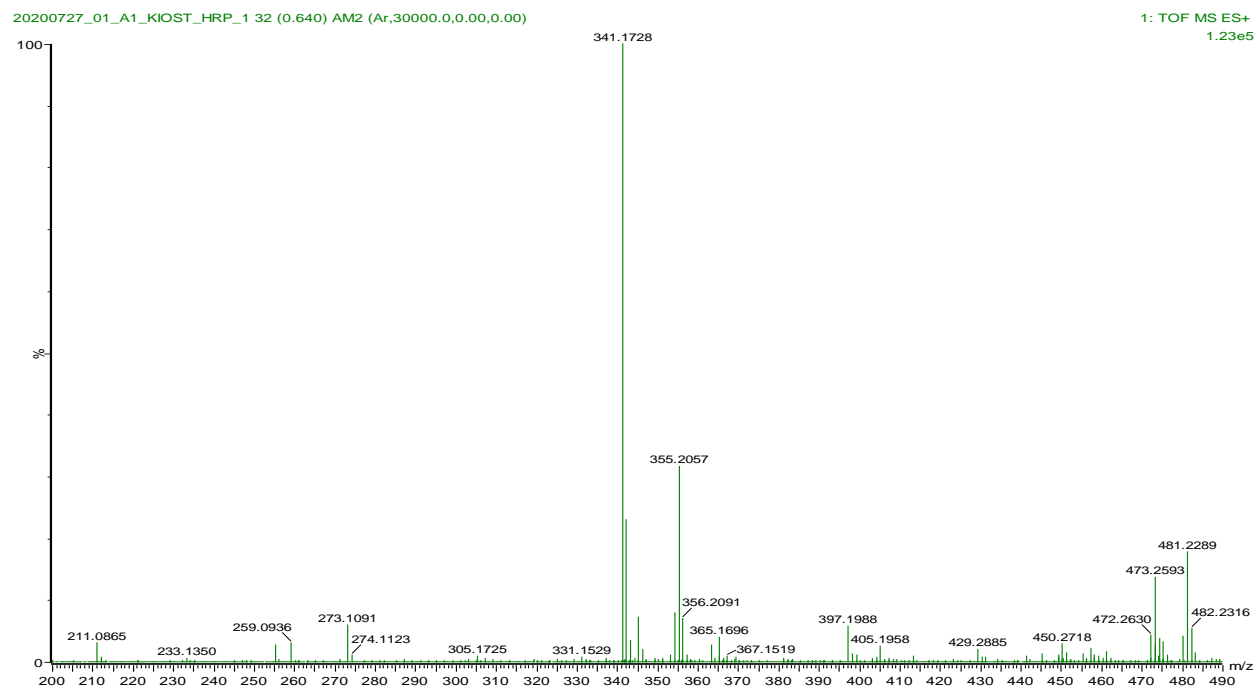

Monoisotopic Mass, Even Electron Ions

83 formula(e) evaluated with 1 results within limits (all results (up to 1000) for each mass)

Elements Used:

C: 0-50 H: 0-50 O: 0-10 Na: 0-1

Minimum:

-1.5

Maximum:

100.0 5.0 100.0

| Mass     | Calc. Mass | mDa  | PPM  | DBE | i-FIT | Norm | Conf(%) | Formula       |
|----------|------------|------|------|-----|-------|------|---------|---------------|
| 341.1728 | 341.1729   | -0.1 | -0.3 | 6.5 | 650.9 | n/a  | n/a     | C19 H26 O4 Na |

**Figure S1.** HR-ESIMS data of **1**.

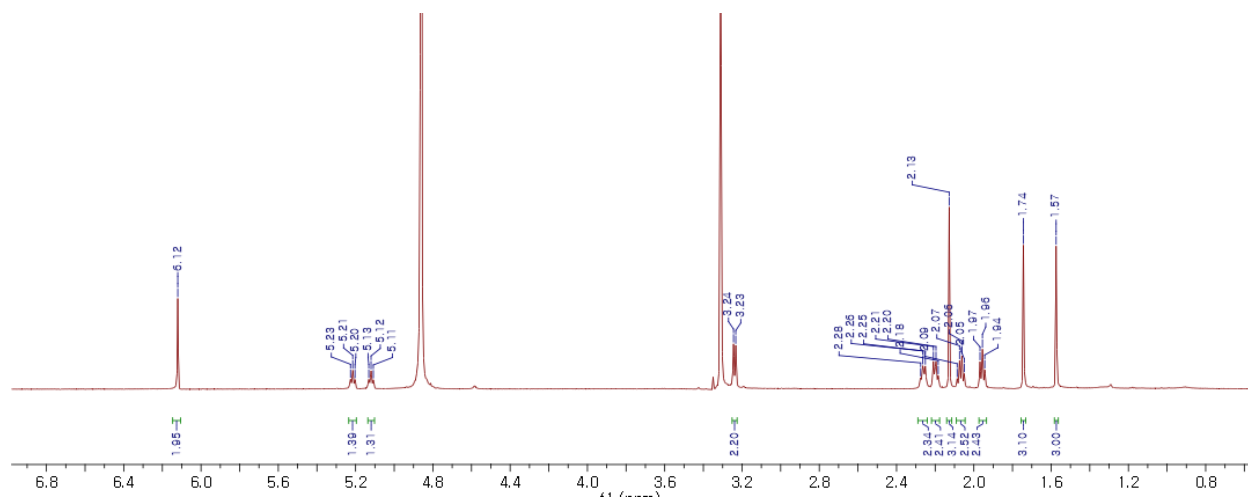

**Figure S2.** <sup>1</sup>H NMR data of **1** (600 MHz, CD<sub>3</sub>OD).

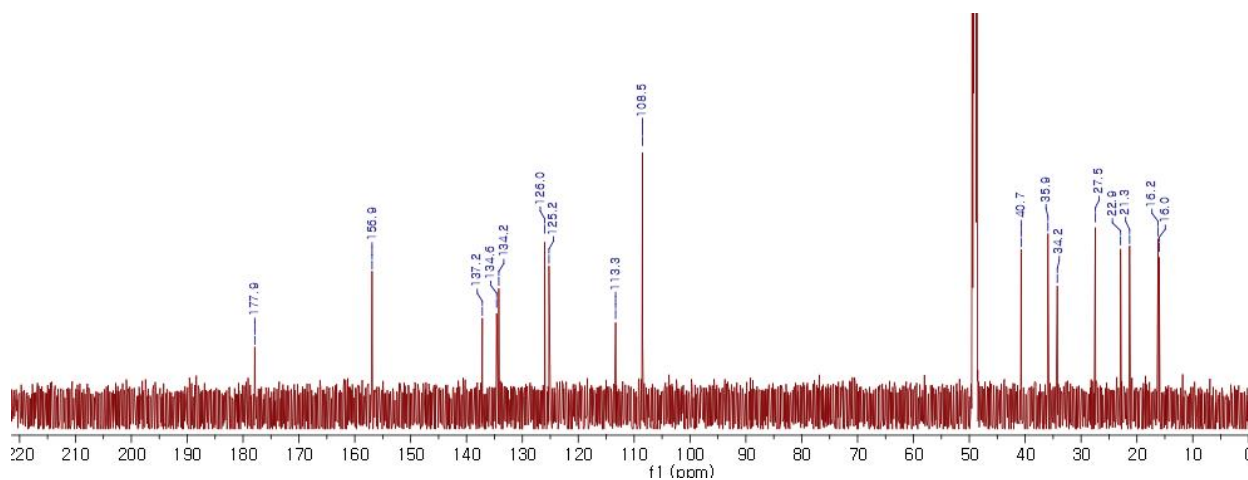

**Figure S3.** <sup>13</sup>C NMR data of **1** (150 MHz, CD<sub>3</sub>OD).

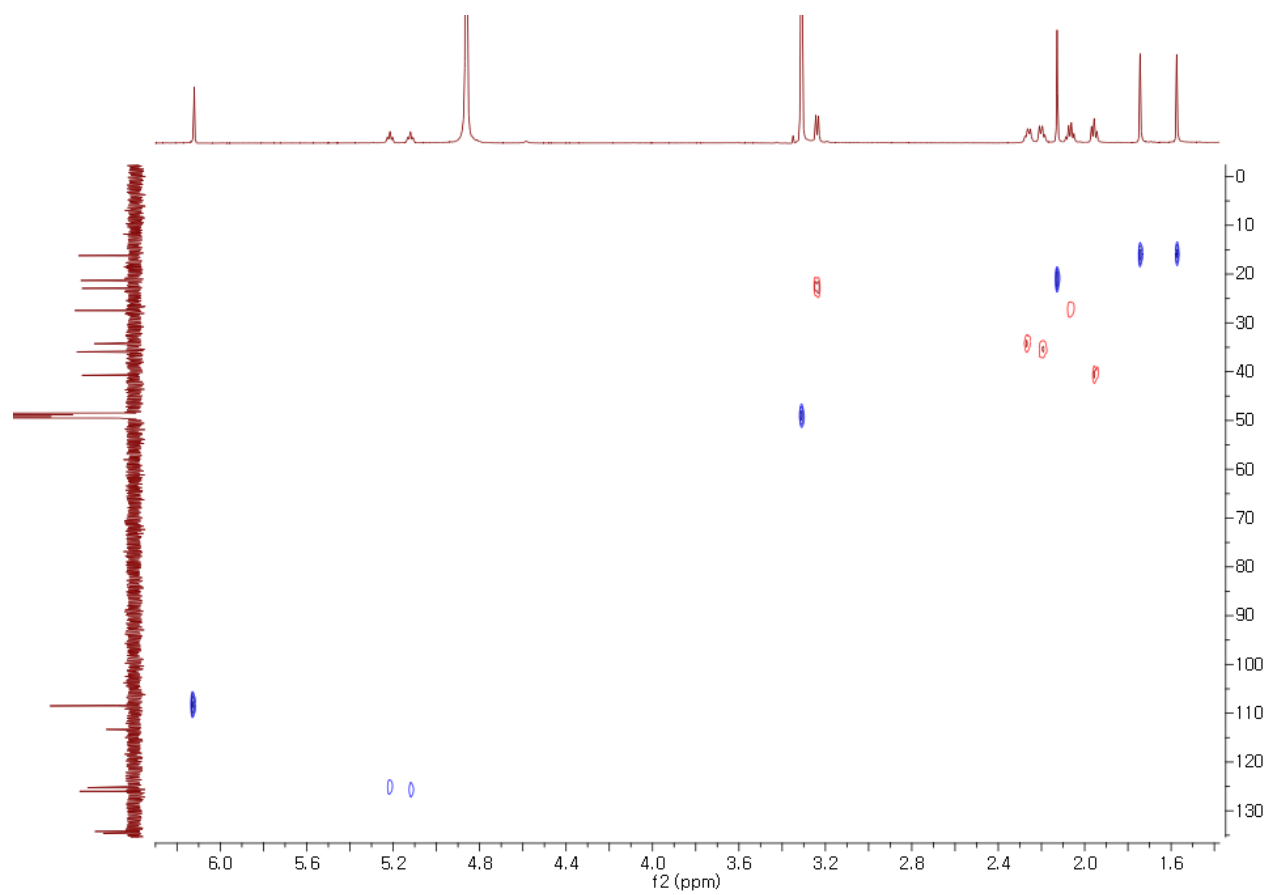

**Figure S4.** HSQC spectrum of **1** (CD<sub>3</sub>OD).

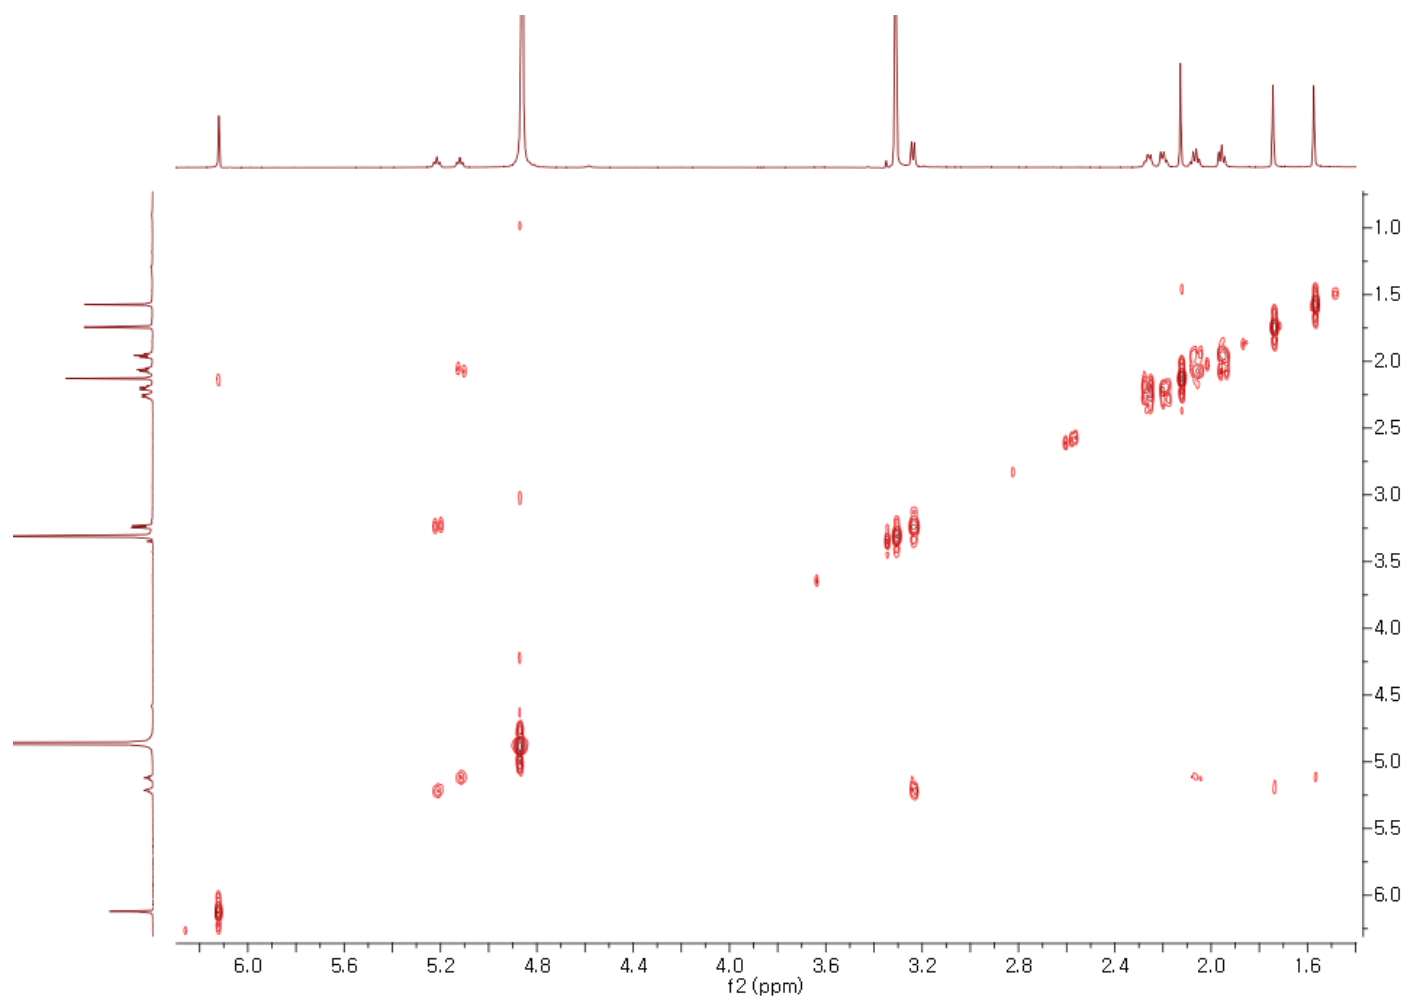

**Figure S5.** COSY spectrum of **1** (CD<sub>3</sub>OD).

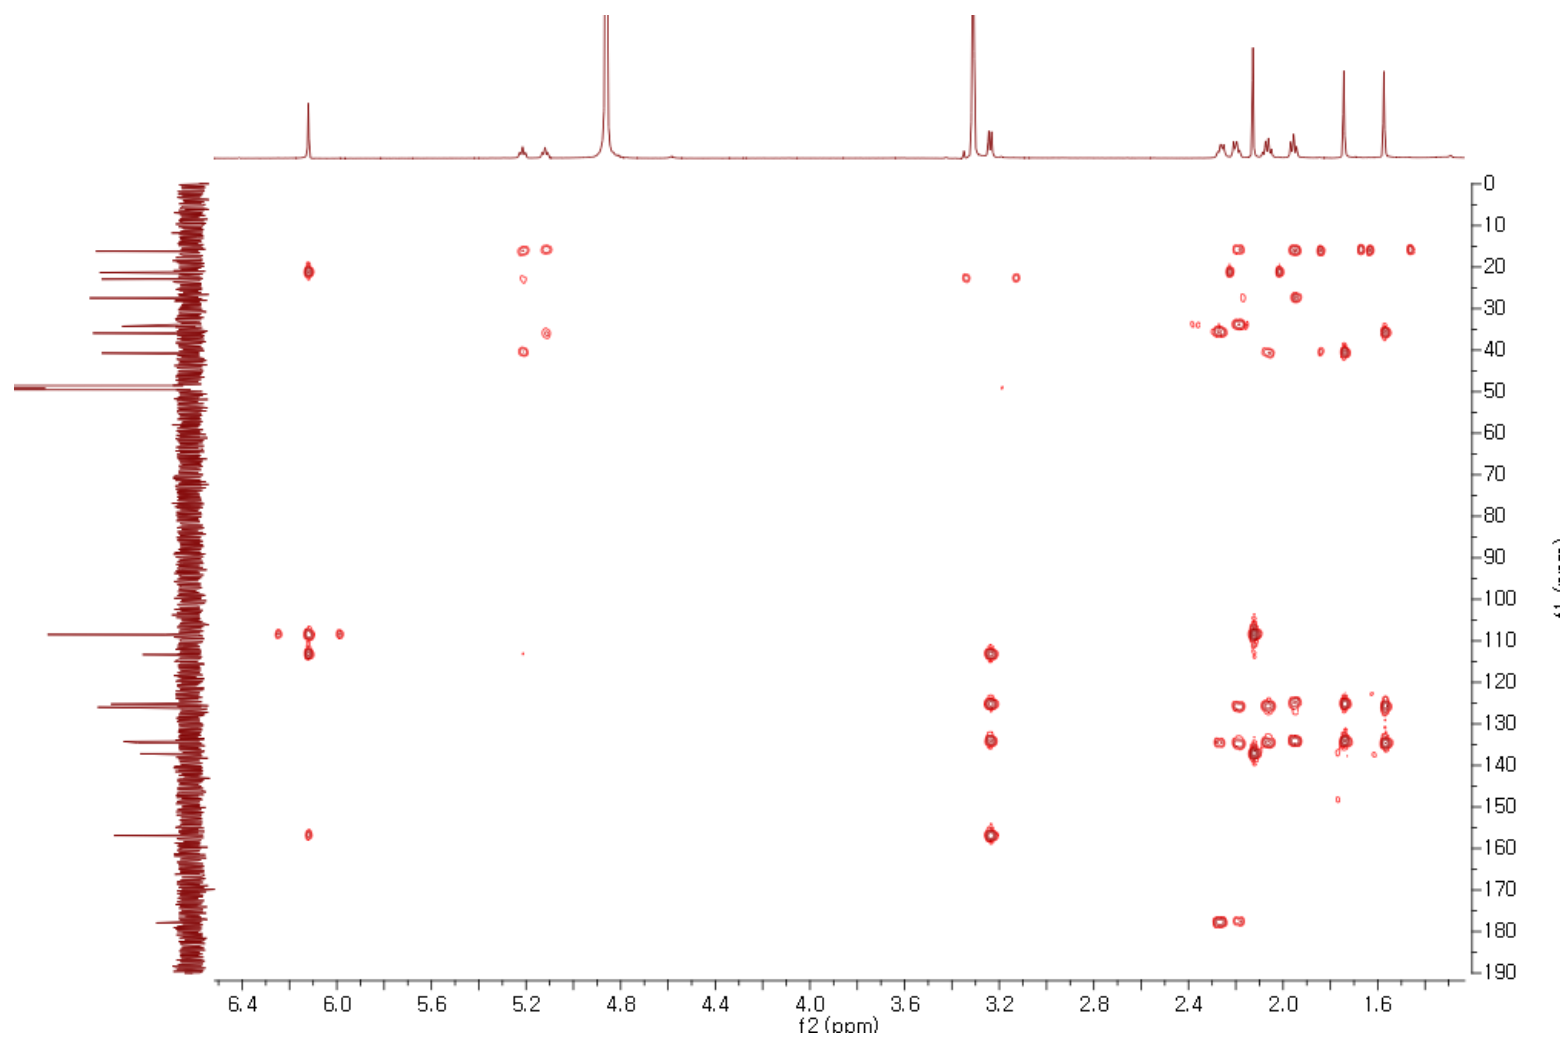

**Figure S6.** HMBC spectrum of **1** (CD<sub>3</sub>OD).

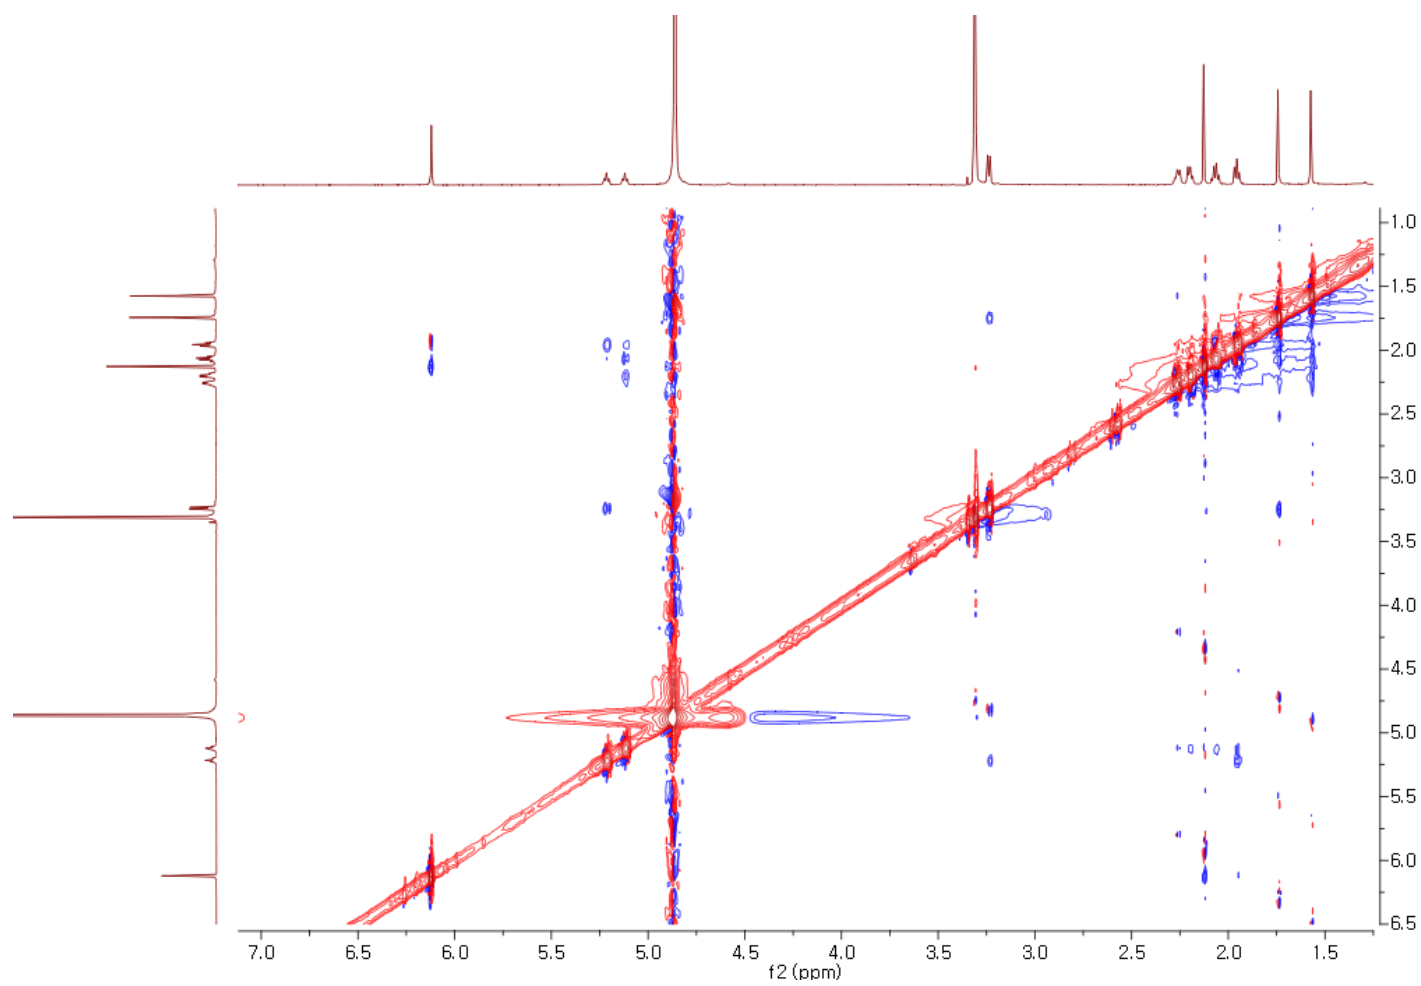

**Figure S7.** NOESY spectrum of **1** (CD<sub>3</sub>OD).

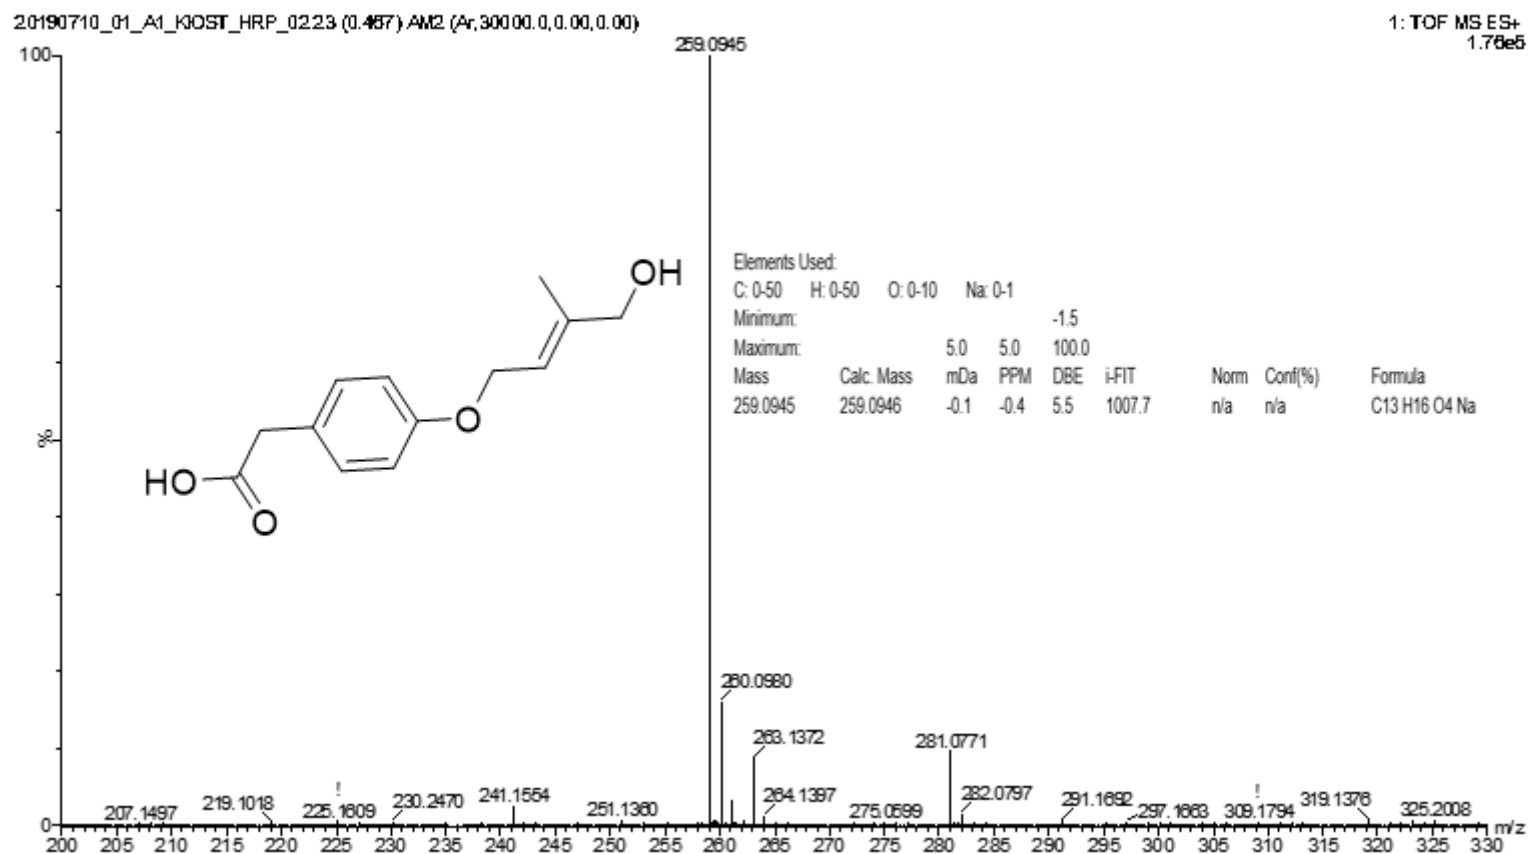

**Figure S8.** HR-ESIMS data of **7**.

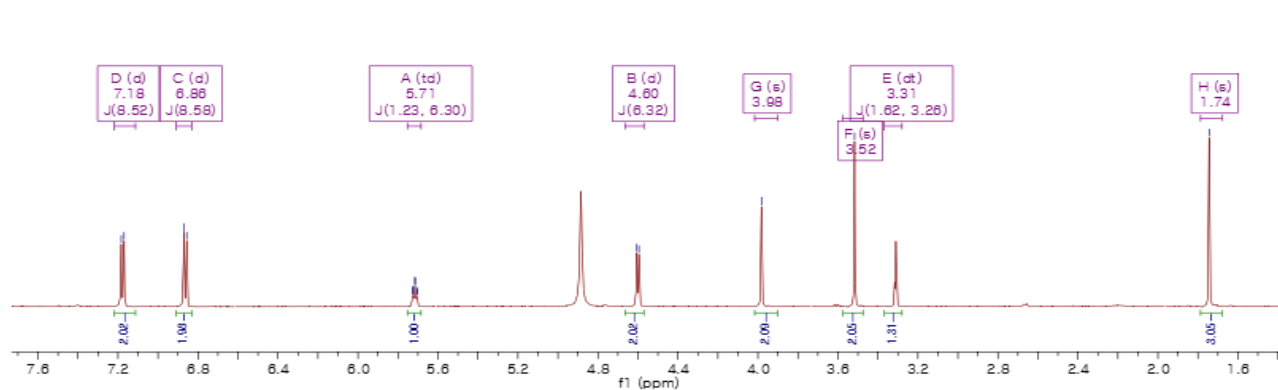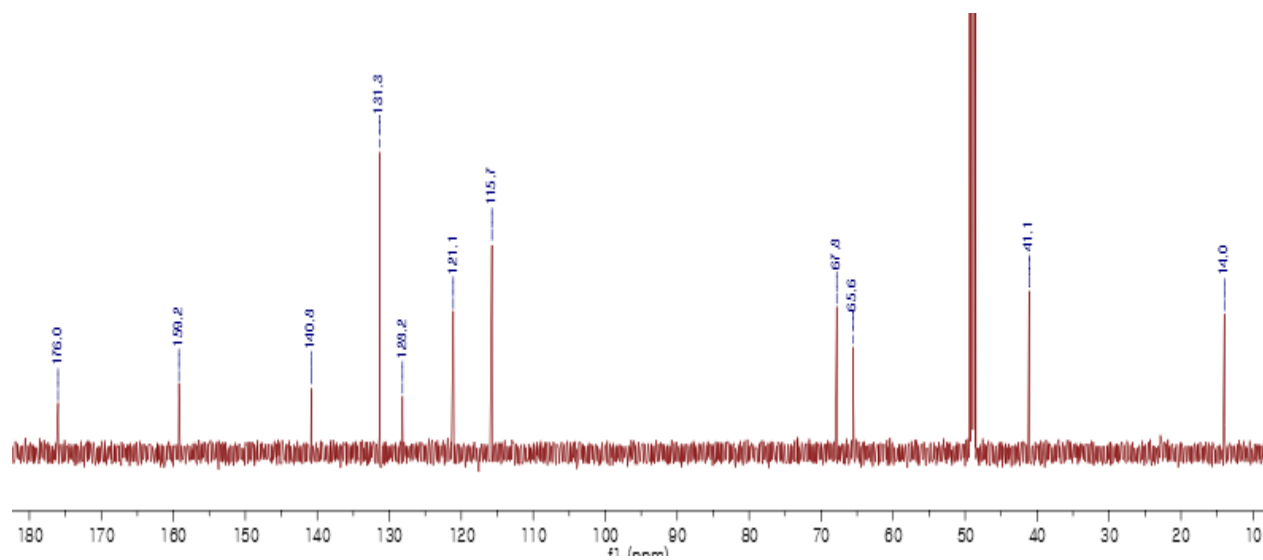

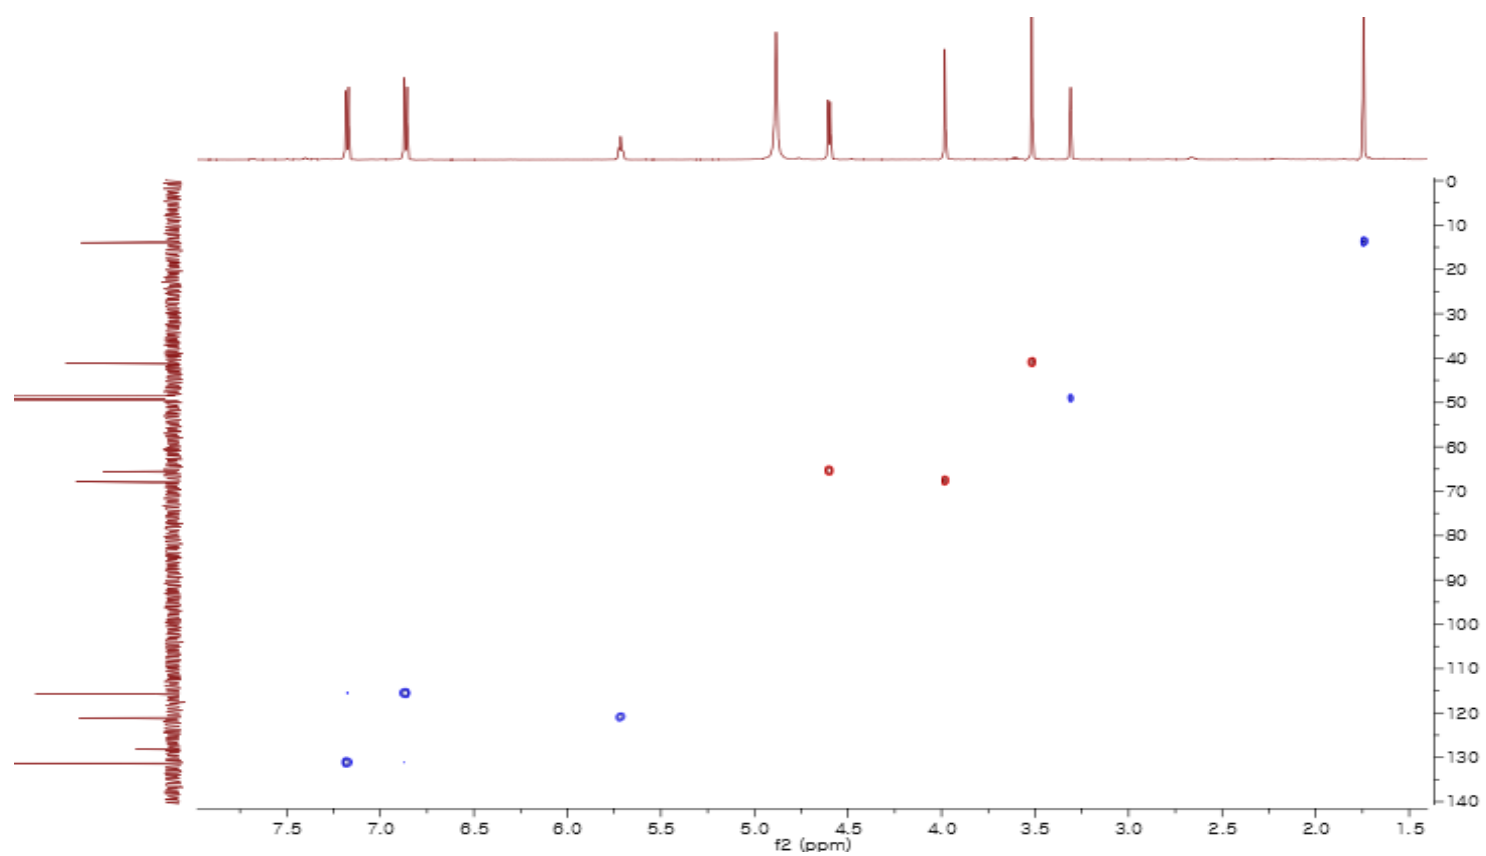

**Figure S11.** HSQC spectrum of **7** (CD<sub>3</sub>OD).

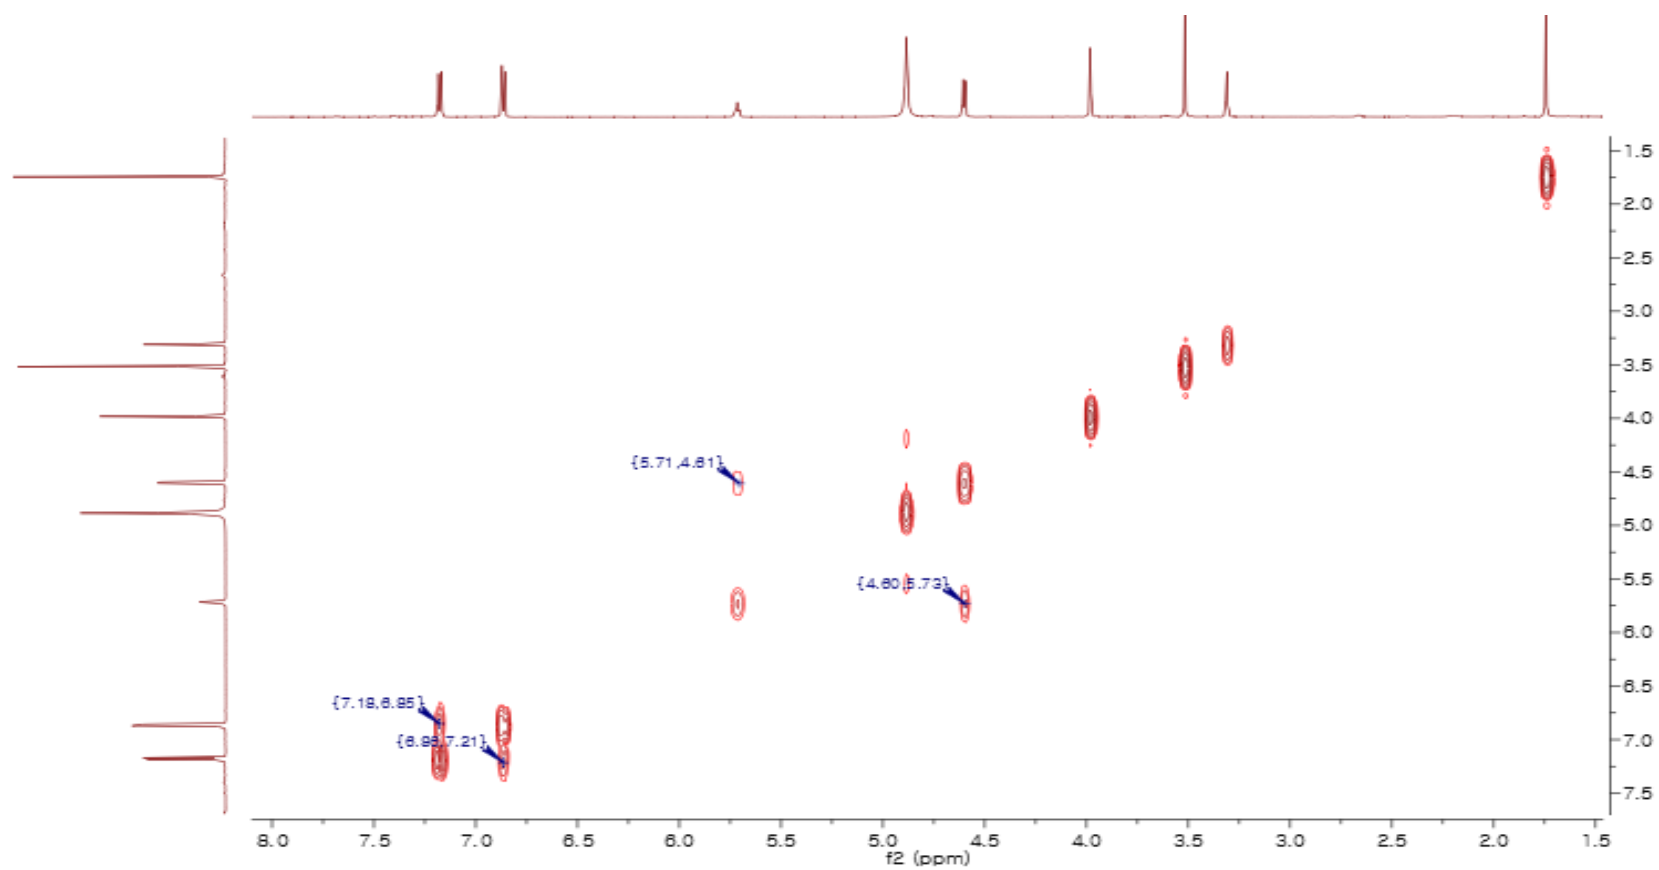

**Figure S12.** COSY spectrum of **7** (CD<sub>3</sub>OD).

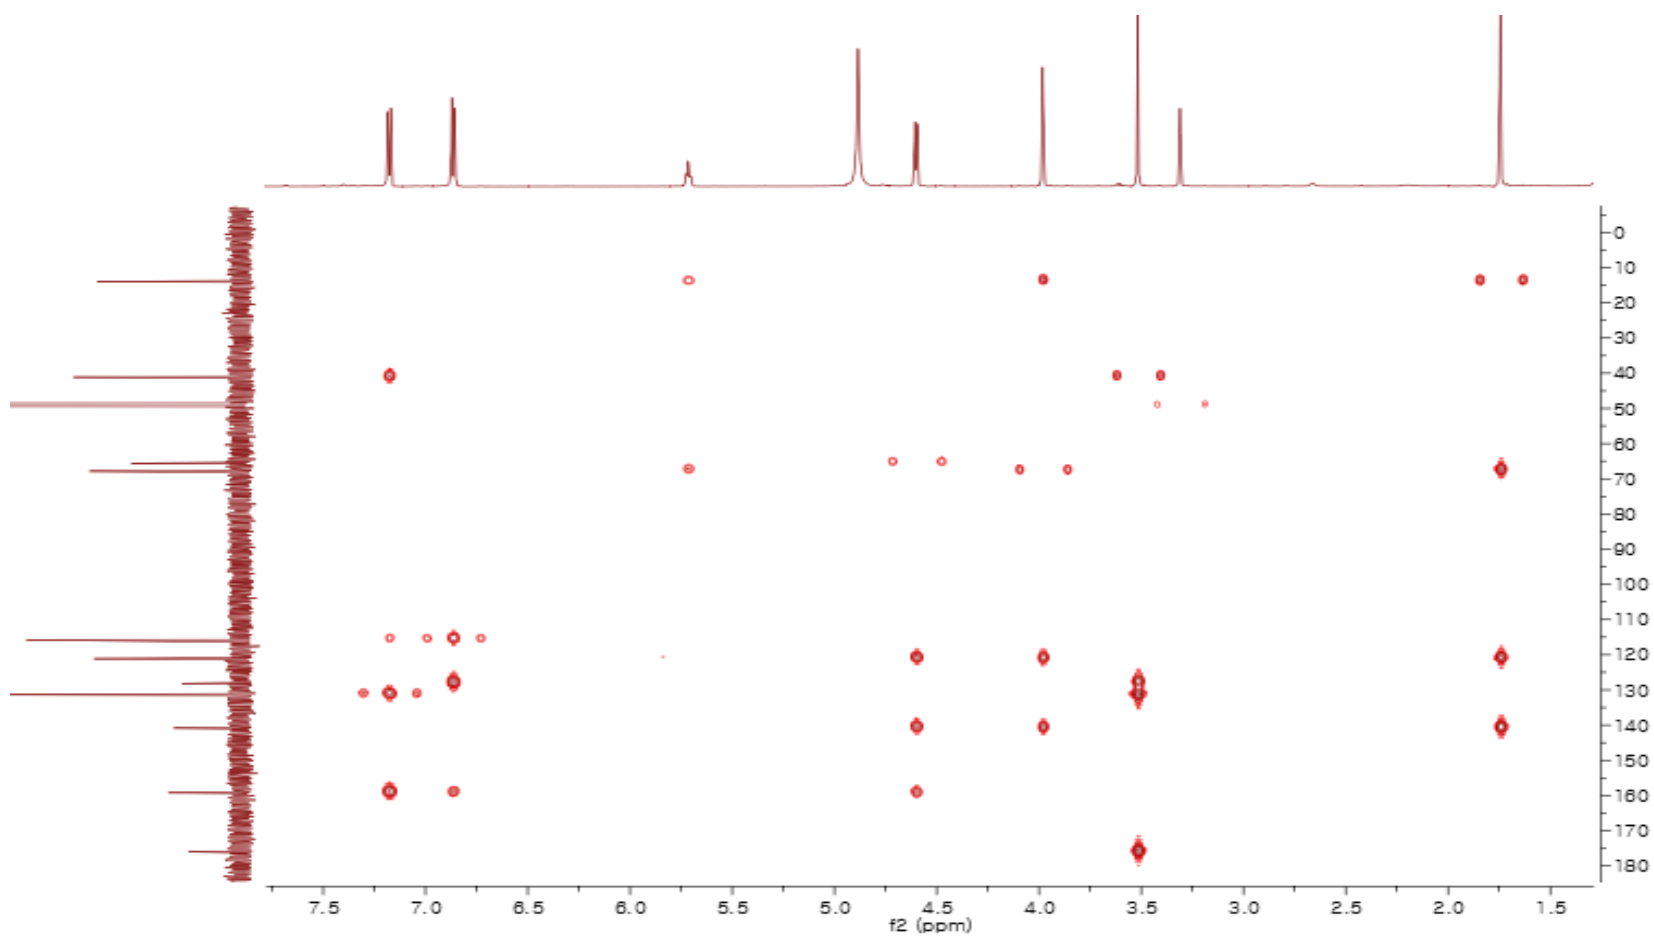

**Figure S13.** HMBC spectrum of **7** ( $\text{CD}_3\text{OD}$ ).

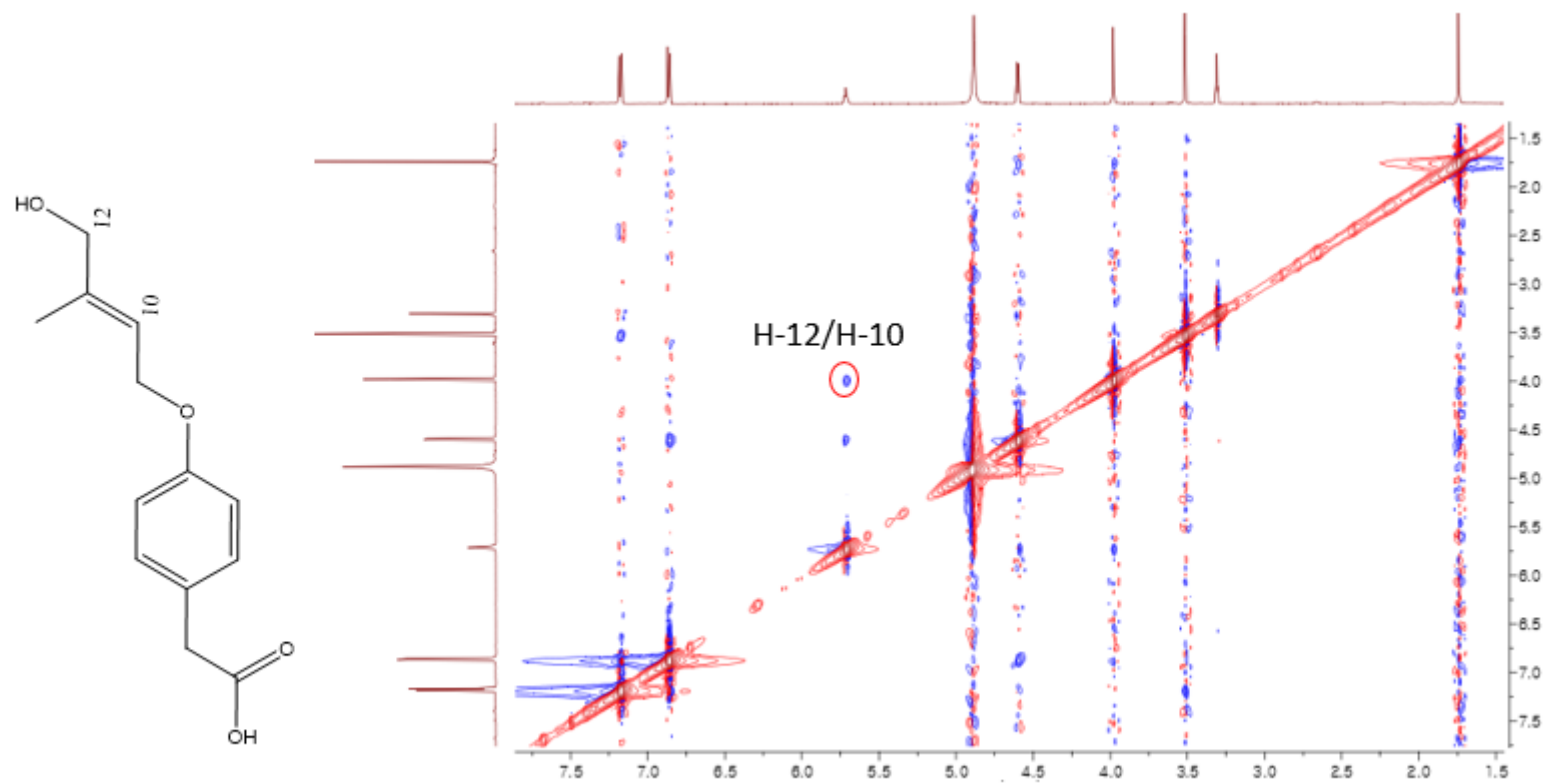

**Figure S14.** NOESY spectrum of **7** (CD<sub>3</sub>OD).

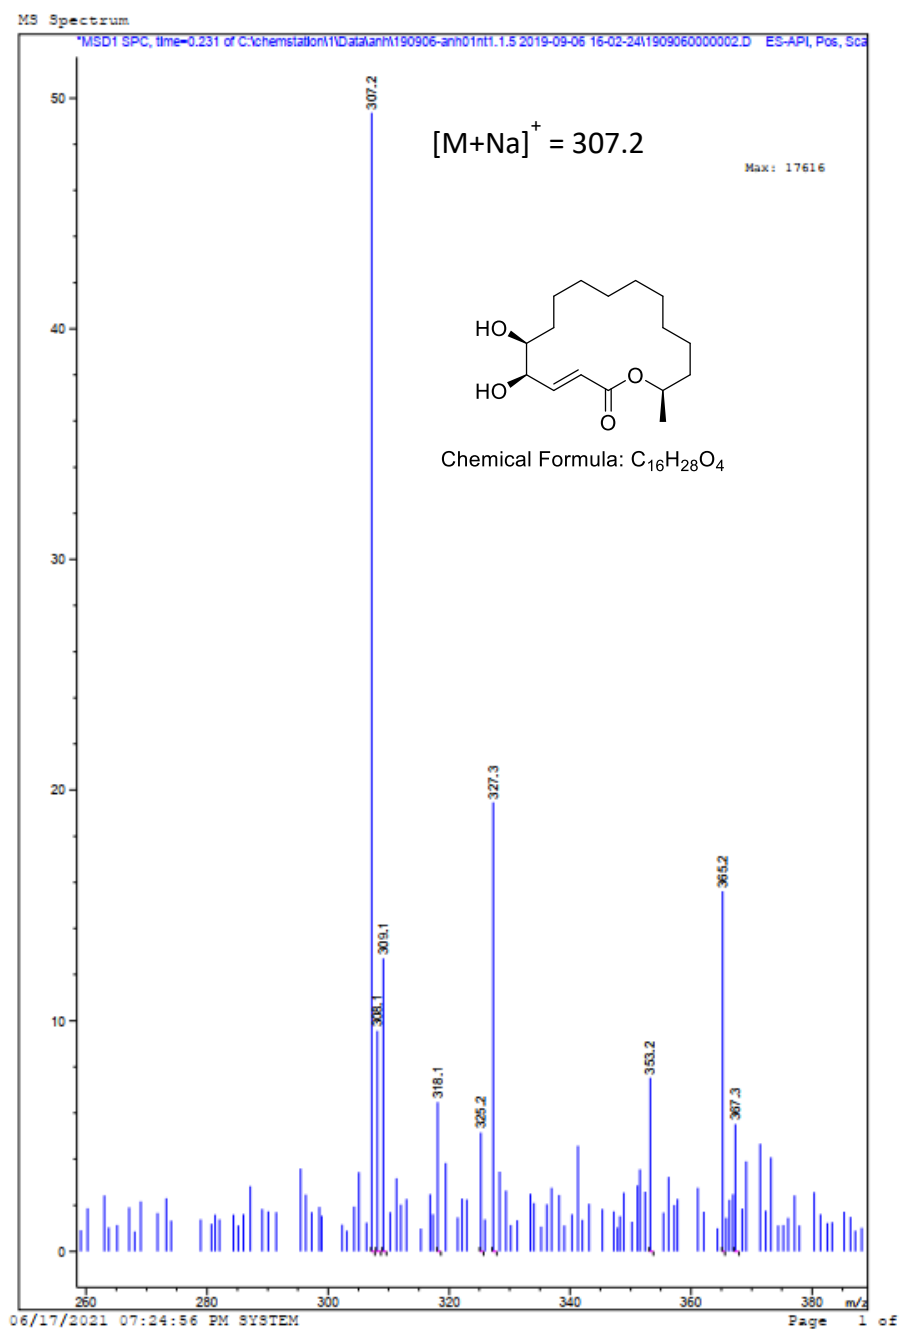

**Figure S15.** LCESI-MS data of **9**

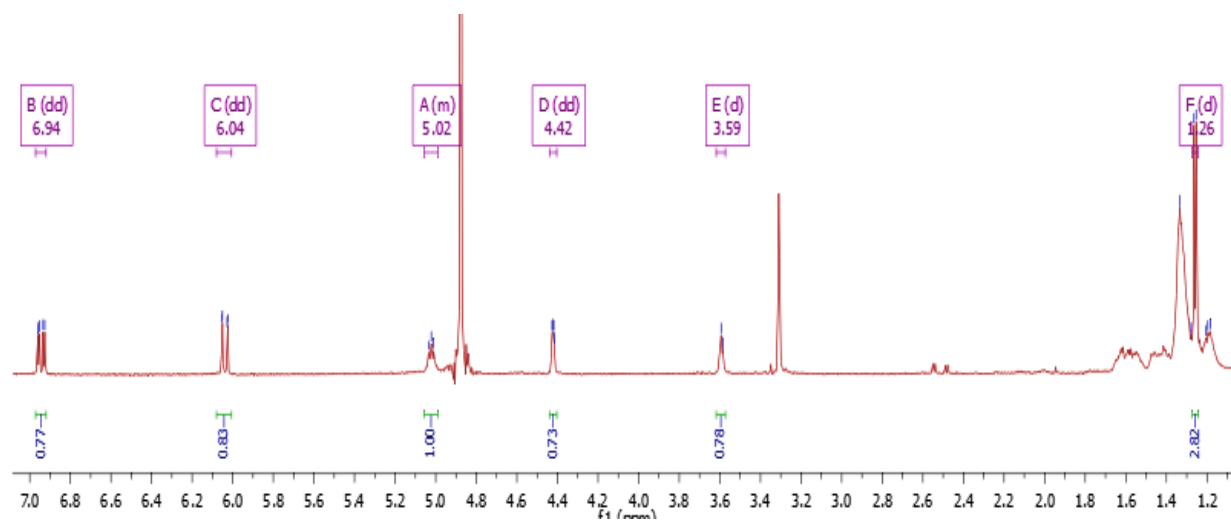

**Figure S16.** <sup>1</sup>H NMR data of **9** (600 MHz, CD<sub>3</sub>OD).

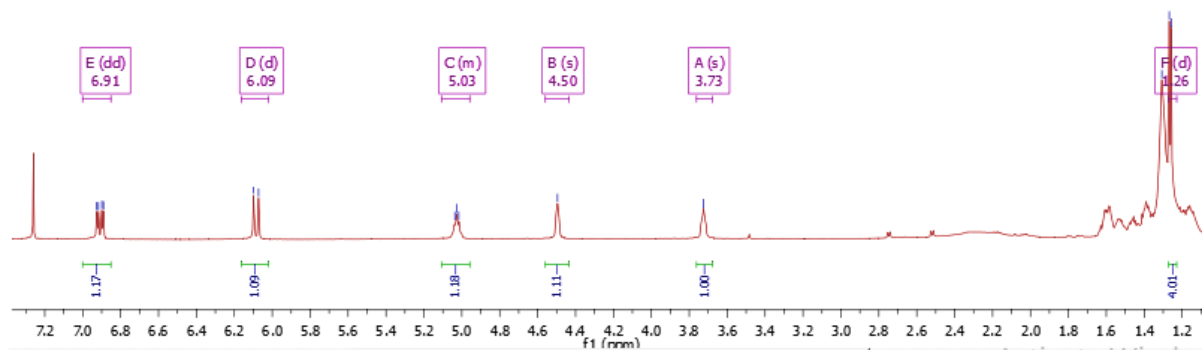

**Figure S17.** <sup>1</sup>H NMR data of **9** (600 MHz, CDCl<sub>3</sub>).

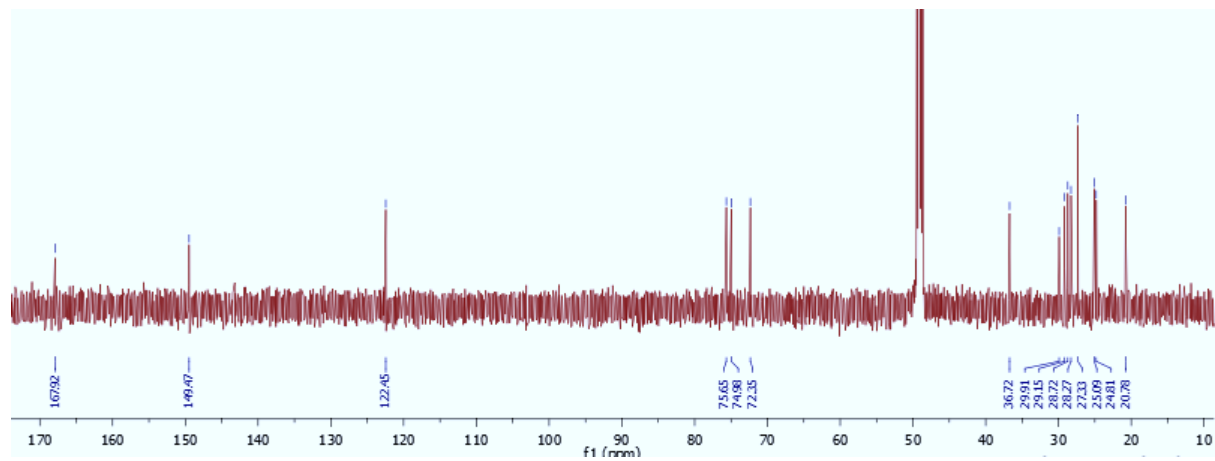

**Figure S18.** <sup>13</sup>C NMR data of **9** (150 MHz, CD<sub>3</sub>OD).
